# Supplementary material for: CdTe QD-based inhibition and reactivation assay of acetylcholinesterase for the detection of organophosphorus pesticides
Source: Royal Society of Chemistry journal article supplement (doi:10.1039/d0ra03055d), 2020-01-01
Supplement: d0ra03055d1.pdf [file d0ra03055d1.pdf]

## Supplementary Materials

### **CdTe QD-Based Inhibition and Reactivation Assay of Acetylcholinesterase for Detection of Organophosphorus Pesticides**

**Jyoti Korram<sup>a</sup>, Lakshita Dewangan<sup>a</sup>, Indrapal Karbhal<sup>a</sup>, Rekha Nagwanshi<sup>b</sup>, Sandeep K. Vaishnav<sup>a&c</sup>, Kallol K. Ghosh<sup>a</sup> and Manmohan L. Satnami<sup>a\*</sup>**

<sup>a</sup>School of Studies in Chemistry, Pt. Ravishankar Shukla University, Raipur (Chhattisgarh)-492010, India

<sup>b</sup>Department of Chemistry, Govt. Madhav Science P. G. College, Ujjain (Madhya Pradesh)-456020, India

<sup>c</sup>State Forensic Science Laboratory, Raipur (Chhattisgarh)-492010, India

[manmohanchem@gmail.com](mailto:manmohanchem@gmail.com)

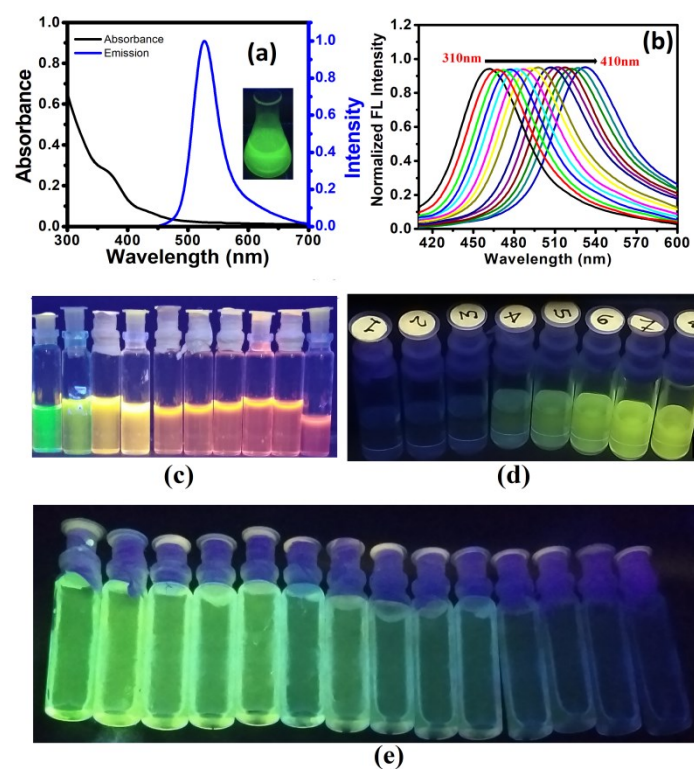

**Fig. S1 (a)** Absorption and FL spectra of CdTe-GSH QDs excited at 380 nm. Inset: Strong green FL of CdTe-GSH QDs solution observed by the naked eyes under 365 nm UV lamp illuminations, **(b)** FL spectra of CdTe QDs excited at different wavelength from 310 nm to 410 nm, **(c)** Photographic Image, **(d)** Colorimetric of CdTe QDs/AChE/ChOx biosensor in UV light at various concentration of paraoxon (OPs) at and blank (no paraoxon and ACh), **(e)** CdTe QDs/AChE/ChOx biosensor in UV light at various concentration of 4-C<sub>12</sub>PyOx<sup>-</sup>.

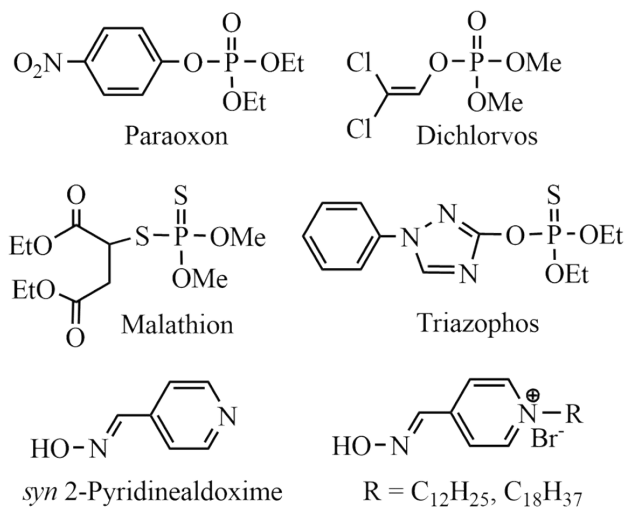

### CHART S1

**Table S1-** Correlation of Optical bandgaps and Size of CdTe Quantum Dots

| S.No. | Refluxing time (min) | Optical Bandgap (eV) | Size (nm) |
|-------|----------------------|----------------------|-----------|
| 1     | 05                   | 3.50                 | 1.4       |
| 2     | 10                   | 3.30                 | 1.7       |
| 3     | 15                   | 3.12                 | 1.8       |
| 4     | 20                   | 3.05                 | 1.9       |
| 5     | 25                   | 3.00                 | 2.0       |
| 6     | 30                   | 2.90                 | 2.1       |
| 7     | 35                   | 2.80                 | 2.5       |
| 8     | 40                   | 2.56                 | 2.8       |

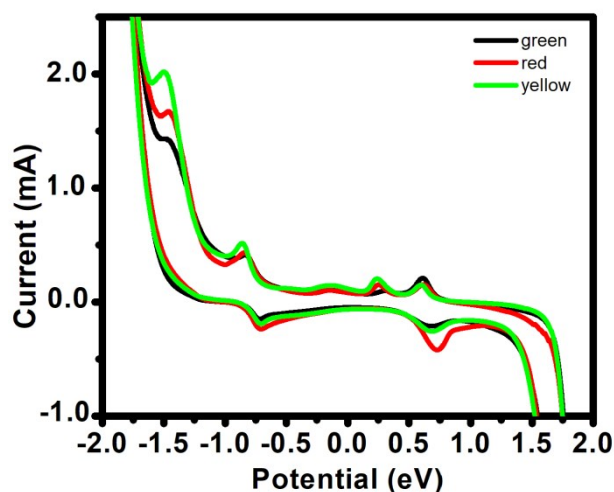

**Fig. S2** Cyclic voltammogram of TGA capped CdTe Quantum dots

**Table S2** Fluorescence decay parameter for CdTe QDs the decay times ( $\tau_1$ , and  $\tau_2$ ) and the weighted average decay time ( $\tau_{av}$ ) and the quality of fitting ( $\chi^2$ ) are shown.

| Time  | ( $\lambda_{ex}$ ) nm | ( $\lambda_{ex}$ ) nm | $\tau_1$ (ns) | $\tau_2$ (ns) | $\chi^2$ | $\tau_{av}$ (ns) |
|-------|-----------------------|-----------------------|---------------|---------------|----------|------------------|
| 10min | 385                   | 525                   | 26            | 92            | 1.088    | 59               |
| 15min | 400                   | 540                   | 30            | 98            | 1.037    | 64               |
| 20min | 400                   | 545                   | 42            | 147           | 1.123    | 94.5             |
| 25min | 410                   | 565                   | 44            | 185           | 1.181    | 114.5            |
| 30min | 410                   | 575                   | 47            | 192           | 1.117    | 119.5            |
| 35min | 418                   | 585                   | 55            | 254           | 0.981    | 154.5            |
| 40min | 428                   | 595                   | 58            | 252           | 1.035    | 155              |
| 45min | 435                   | 598                   | 58            | 259           | 0.959    | 158.5            |

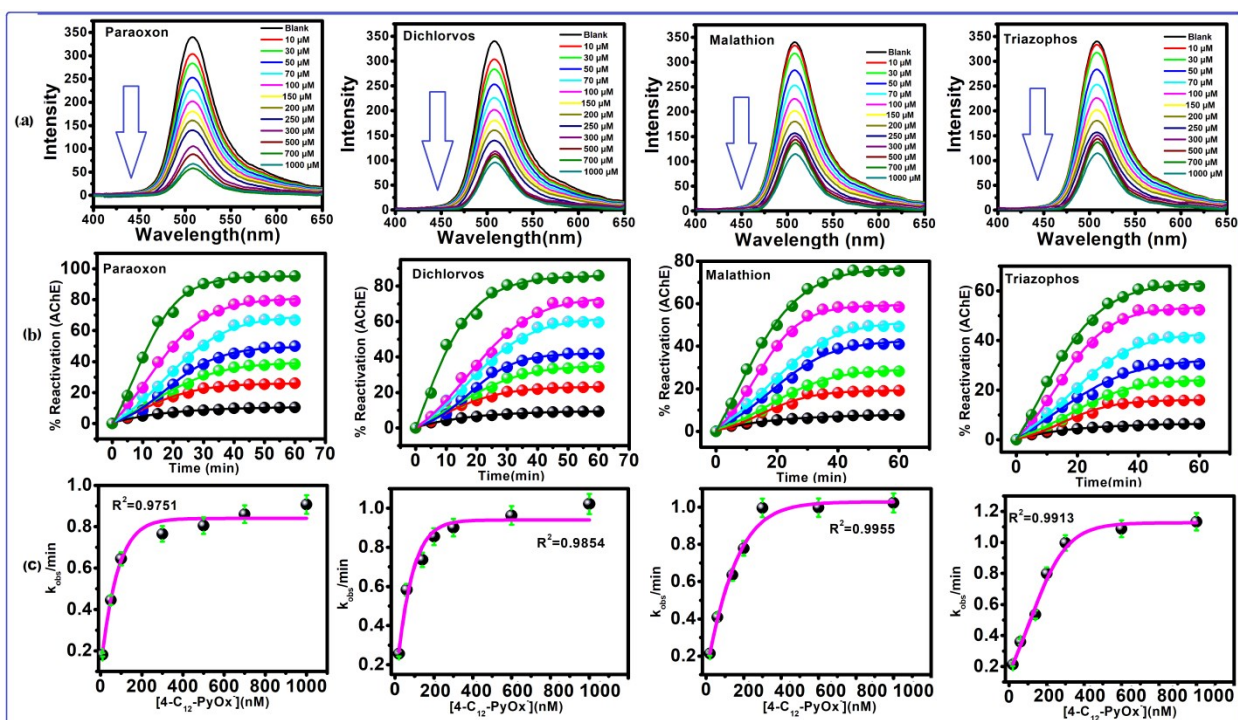

**Fig. S3** Reactivation of inhibited AChE through the OPs using 4-C<sub>12</sub>-PyOx<sup>-</sup>(a) The fluorescence spectra of CdTe QD, in the presence of the 4-C<sub>12</sub>-PyOx<sup>-</sup>, inhibited AChE by paraoxon, dichlorvos, malathion, triazophos (b) Plot between the % reactivation of AChE and time/min(c) .plot between the  $k_{obs}$ /min and concentration of oxime, enabled the calculation of  $K_D$  and  $k_f$

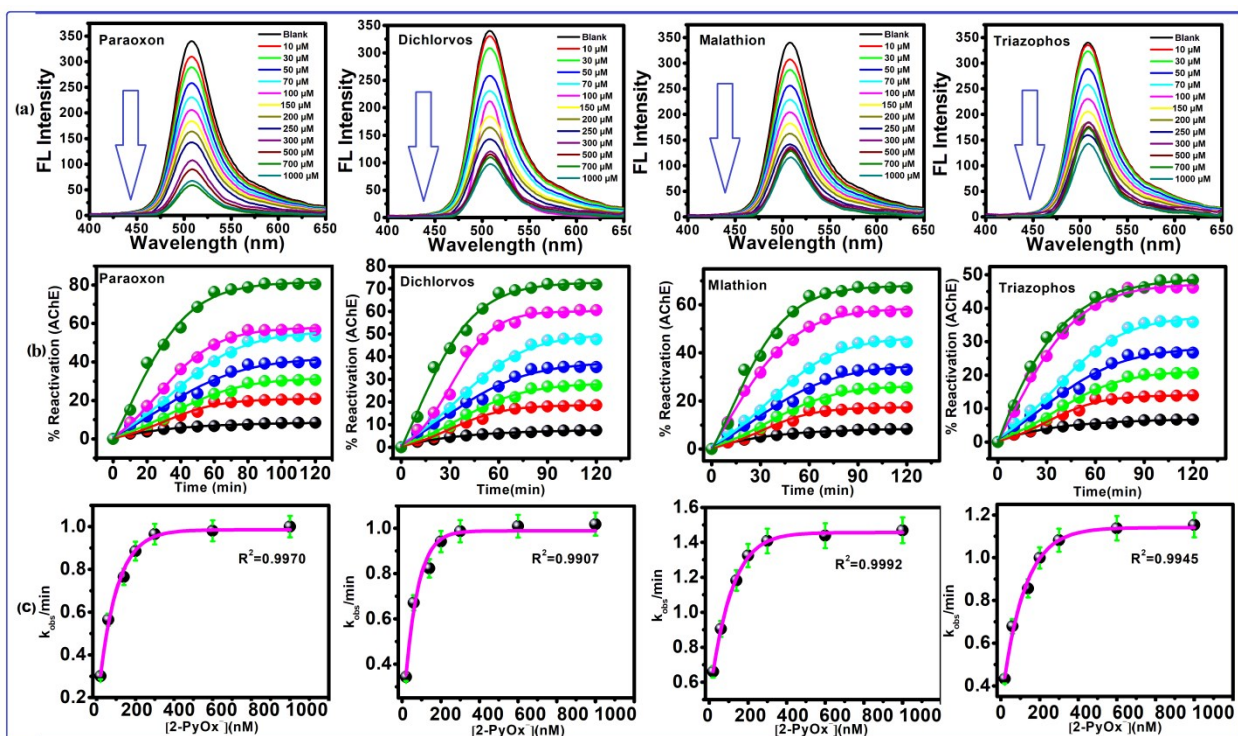

**Fig. S4** Reactivation of inhibited AChE through the OPs using 2-PyOx<sup>-</sup>(a) The fluorescence spectra of CdTe QD, in the presence of the 2-PyOx<sup>-</sup>, inhibited AChE by paraoxon, dichlorvos, malathion,

triazophos (b) Plot between the % reactivation of AChE and time/min.(c) plot between the  $k_{obs}/min$  and concentration of oxime, enabled the calculation of  $K_D$  and  $k_r$ .

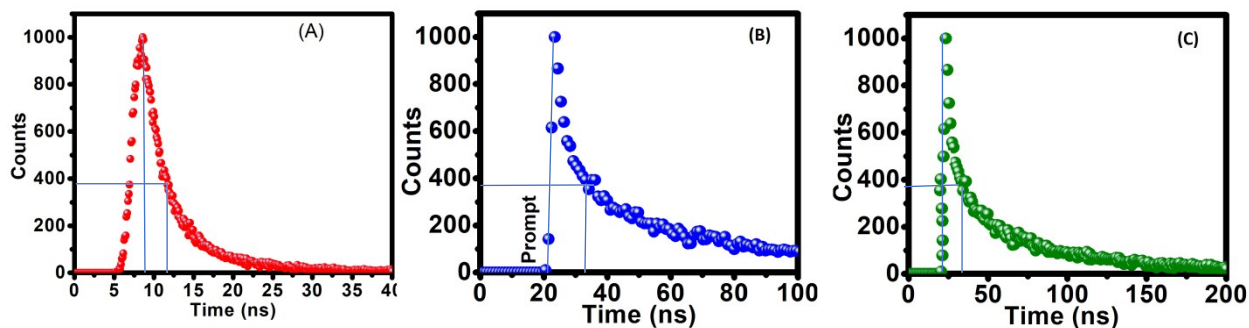

**Fig. S5** Fluorescence lifetime decay of CdTe QDs (A) in the absence of paraoxon (B) in the presence of paraoxon (C) in the presence of paraoxon and oxime.

**Table S3** Fluorescence decay parameter for CdTe QDs assay (A) CdTe/ChOx/AChE, (B) CdTe/ChOx/AChE/OPs, and (C) CdTe/ChOx/AChE/OPs/Oxime, the decay times ( $\tau_1$ , and  $\tau_2$ ) and the weighted average decay time ( $\tau_{av}$ ) and the quality of fitting ( $\chi^2$ ) are shown.

| Sample Name | $\tau_1$ (ns) | $\tau_2$ (ns) | $\tau_{av}$ (ns) |
|-------------|---------------|---------------|------------------|
| A           | 2.6           | 8.7           | 5.65             |
| B           | 36.5          | 115.6         | 76.05            |
| C           | 16.0          | 58.7          | 37.35            |
